# Supplementary material for: Janus nanobelts: fabrication, structure and enhanced magnetic–fluorescent bifunctional performance
Source: Royal Society of Chemistry journal article supplement (doi:10.1039/c3nr05472a), 2013-12-03
Supplement: c3nr05472a.pdf [file c3nr05472a.pdf]

## **Electronic Supplementary Information (ESI)**

### **Janus Nanobelts: Fabrication, Structure and Enhanced Magnetic-Fluorescent Bifunctional Performance**

Qianli Ma, Wensheng Yu, Xiangting Dong,\* Jinxian Wang, and Guixia Liu

*Key Laboratory of Applied Chemistry and Nanotechnology at Universities of Jilin Province,  
Changchun University of Science and Technology, Changchun 130022. Fax: 86 0431 85383815;*

*Tel: 86 0431 85582574; E-mail: dongxiangting888@163.com*

#### **Manufacturing process of the parallel spinneret:**

The manufacturing process of the parallel spinneret was shown in Fig. S1. Two truncated 12 # stainless steel needles were bended at a certain angle and assembled side by side with double sided sticky tape. A plastic nozzle was cut to an appropriate length and put on over the tip of the pair of stainless steel needles. At last, an all-purpose adhesive was used to seal the gap between the pair of stainless steel needles and the top of plastic nozzle.

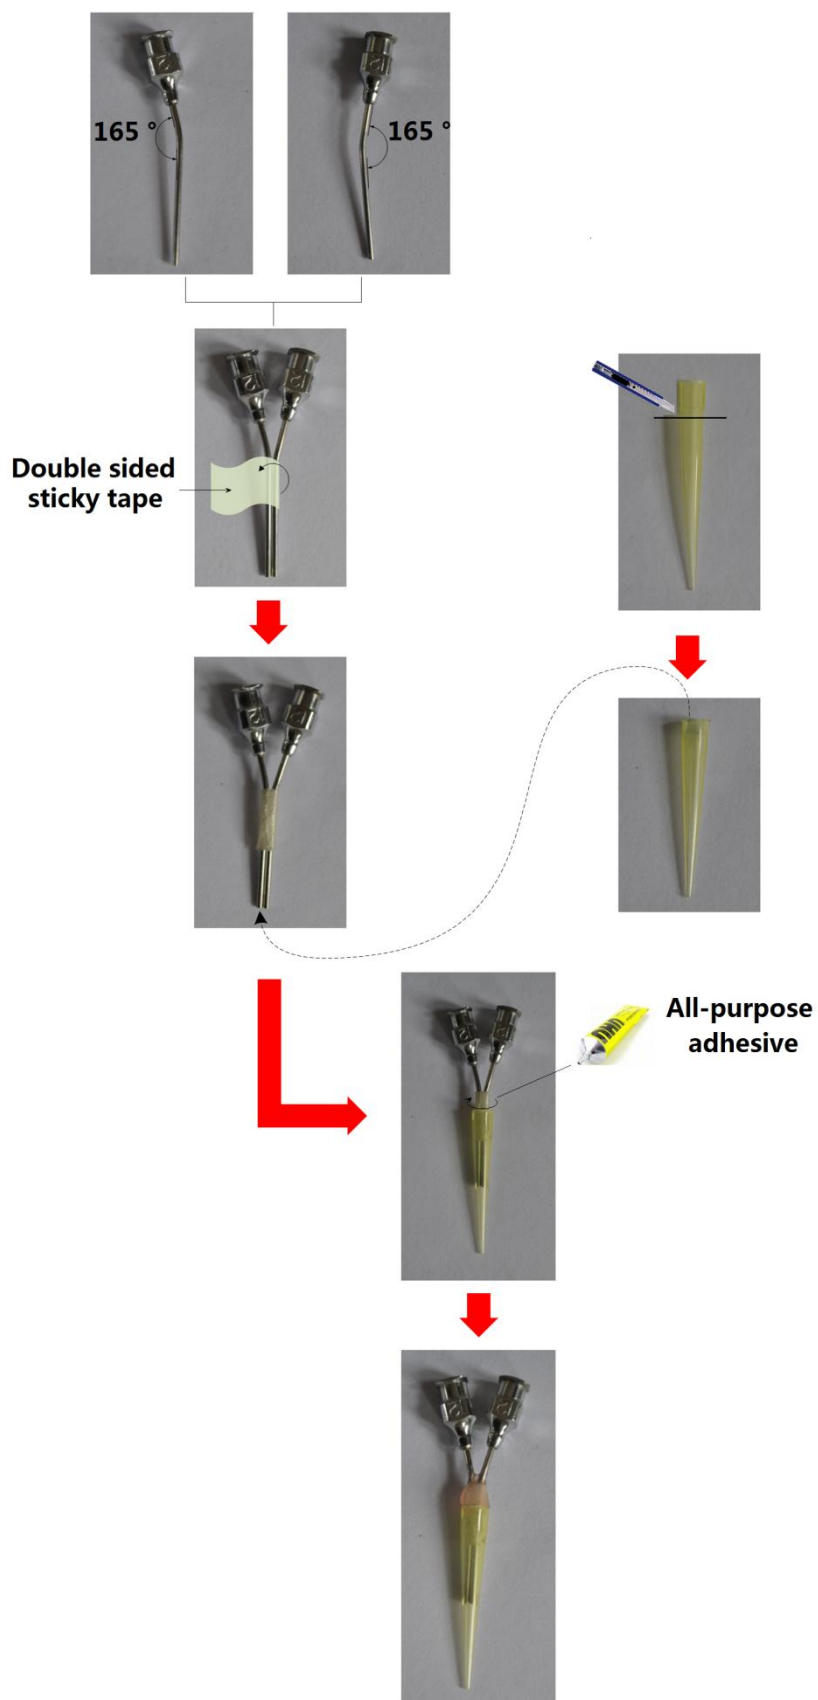

**Fig. S1** Schematic diagram of the manufacturing process of parallel spinneret
